# Supplementary material for: Small RNA-seq reveals novel regulatory components for apomixis in Paspalum notatum
Source: PubMed Central journal article supplement (PMC6567921; doi:10.1186/s12864-019-5881-0), 2019-06-13
Supplement: 12864_2019_5881_MOESM2_ESM.pdf [file 12864_2019_5881_MOESM2_ESM.pdf]

**Additional file 2.** General statistics for the sequencing of triplicate floral sRNA libraries originated from apomictic and sexual *Paspalum notatum* genotypes.

| <b>Sample Name</b> | <b>Total number of reads</b> | <b>% duplicate reads</b> | <b>Sequence length</b> | <b>% GC</b> |
|--------------------|------------------------------|--------------------------|------------------------|-------------|
| <b>Apo1_S1</b>     | 2,996,675                    | 74.3%                    | 50                     | 54%         |
| <b>Apo2_S2</b>     | 1,981,542                    | 70.8%                    | 50                     | 55%         |
| <b>Apo3_S3</b>     | 1,558,547                    | 69.5%                    | 50                     | 54%         |
| <b>Sex1_S4</b>     | 1,986,075                    | 71.3%                    | 50                     | 55%         |
| <b>Sex2_S5</b>     | 2,032,618                    | 72.5%                    | 50                     | 55%         |
| <b>Sex3_S6</b>     | 2,248,170                    | 72.5%                    | 50                     | 55%         |
