# Supplementary material for: Small RNA-seq reveals novel regulatory components for apomixis in Paspalum notatum
Source: PubMed Central journal article supplement (PMC6567921; doi:10.1186/s12864-019-5881-0), 2019-06-13

**Additional file 5 : Folding analysis of miRNA putative precursors**

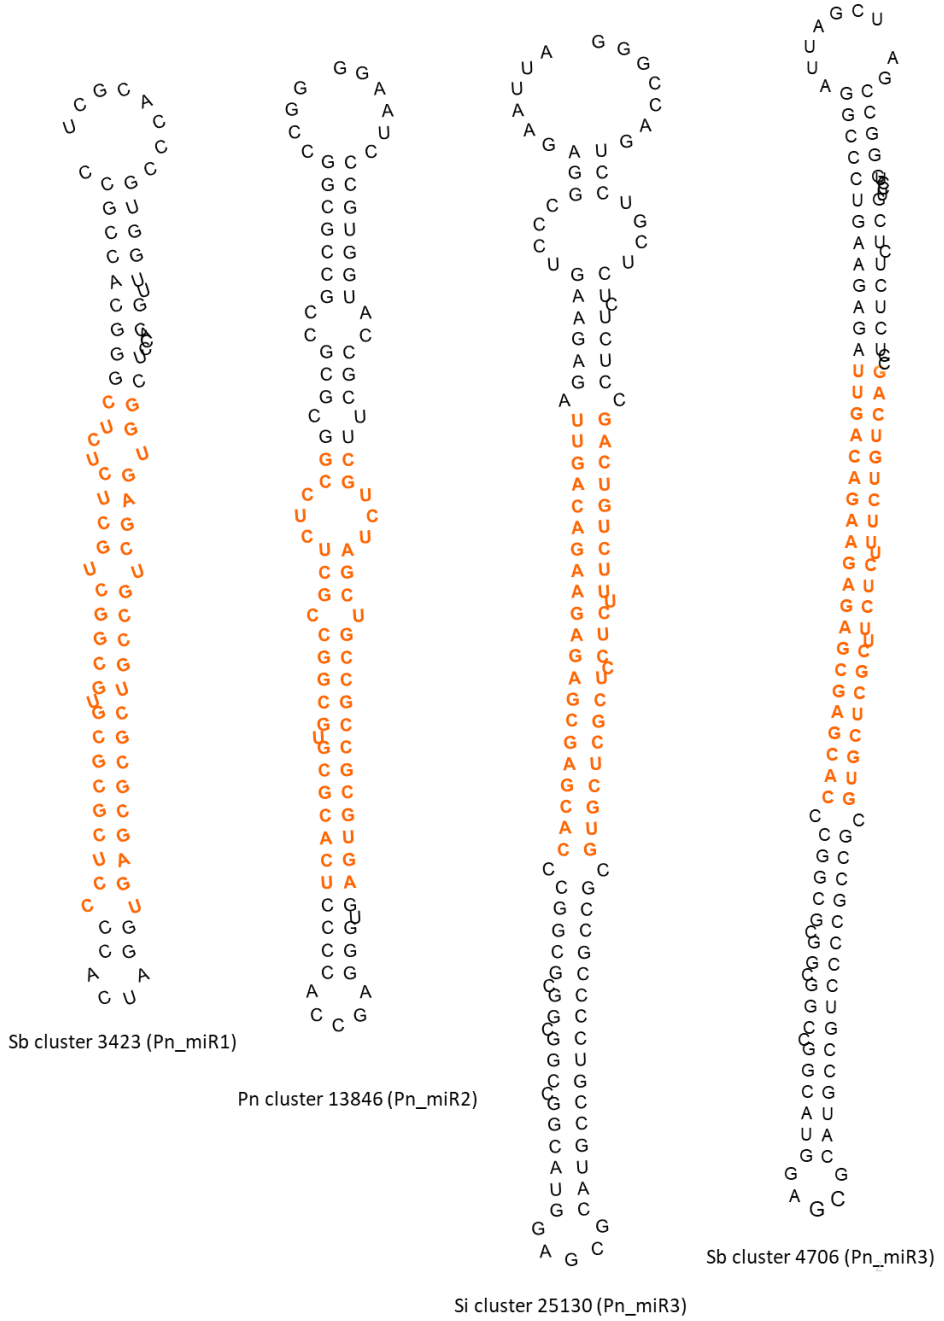

Additional file 5 (continued)

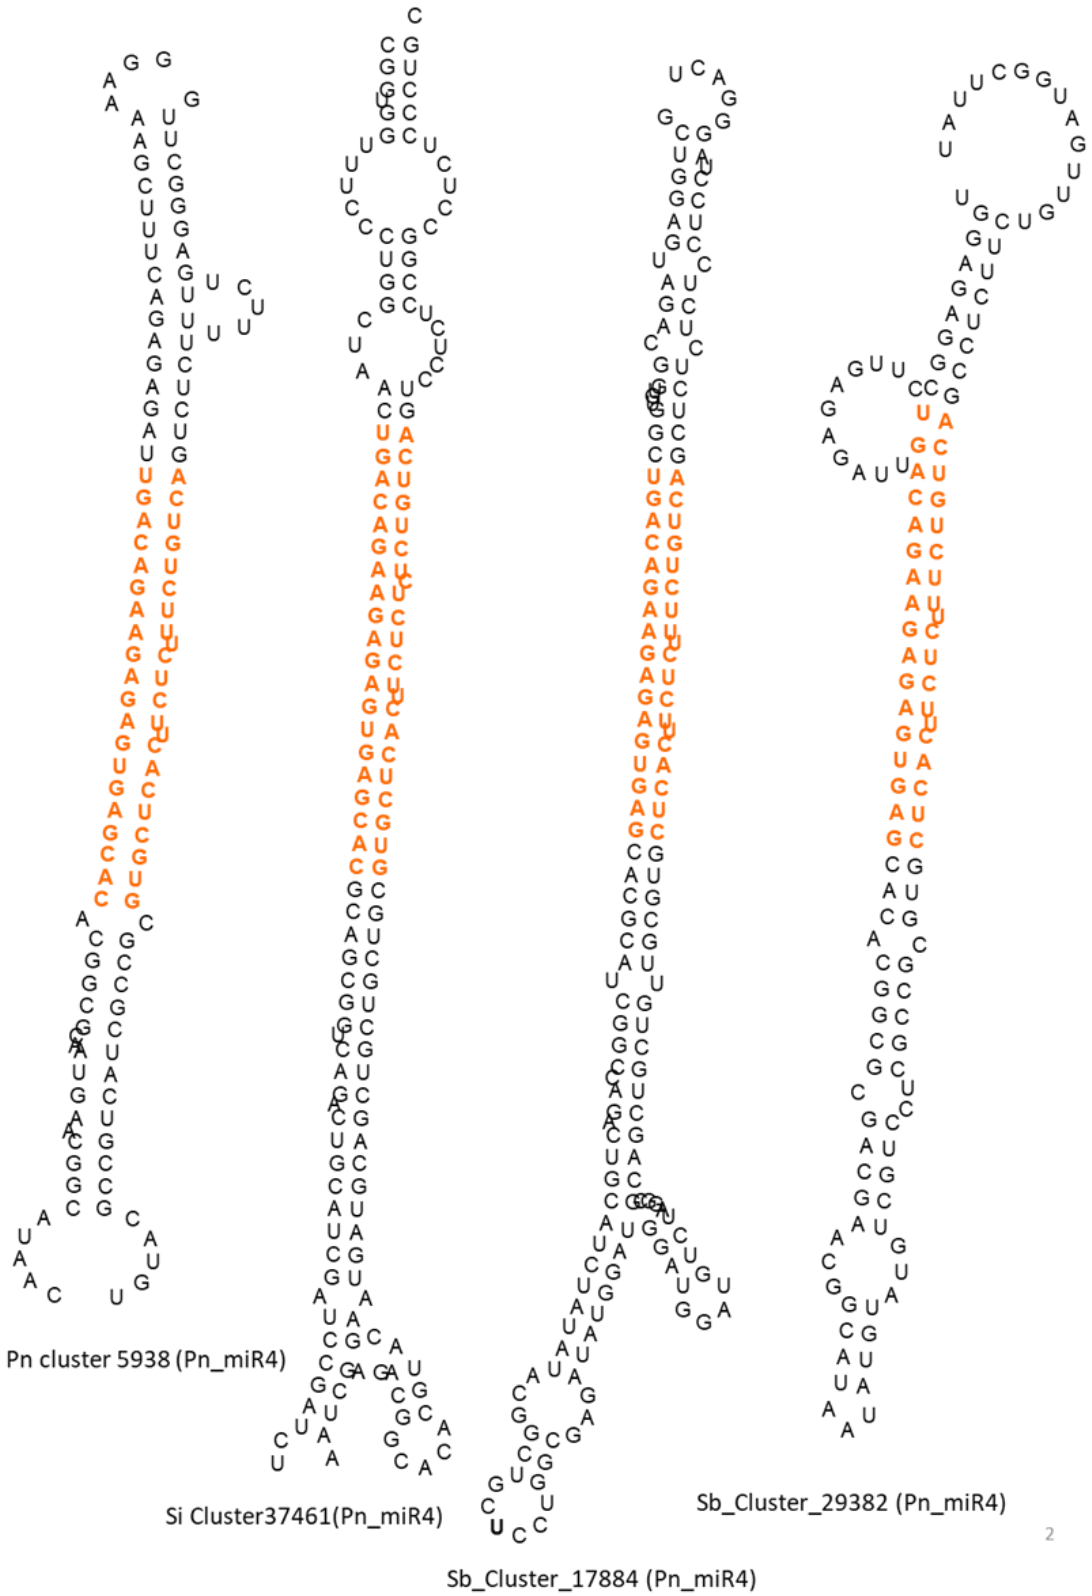

Additional file 5 (continued)

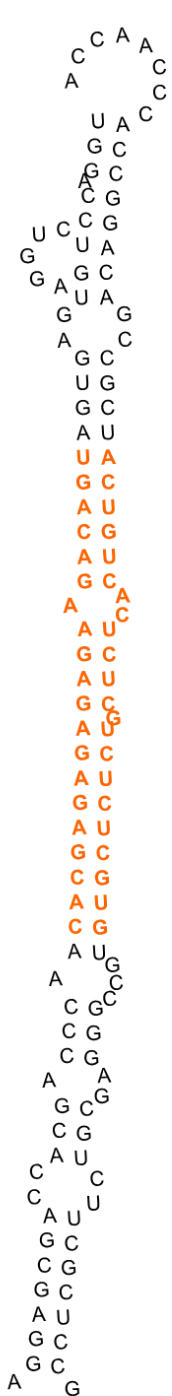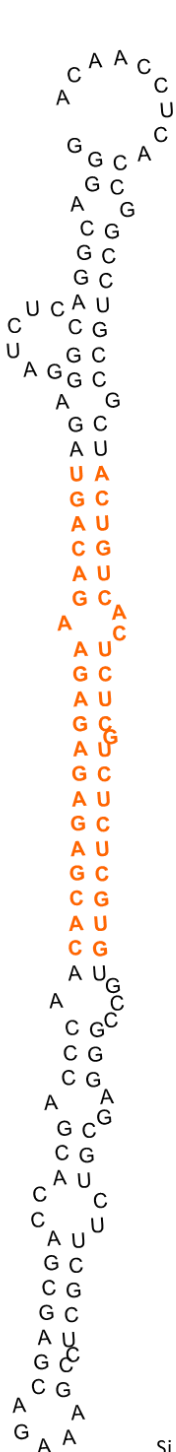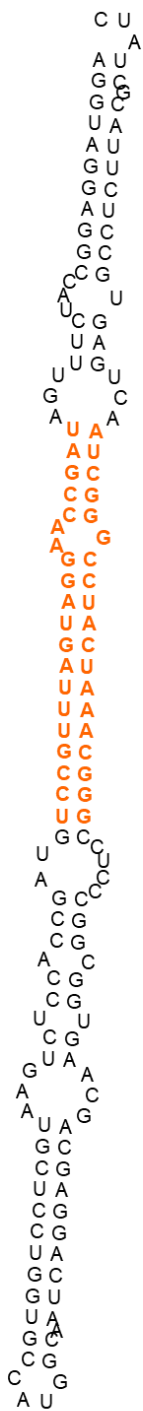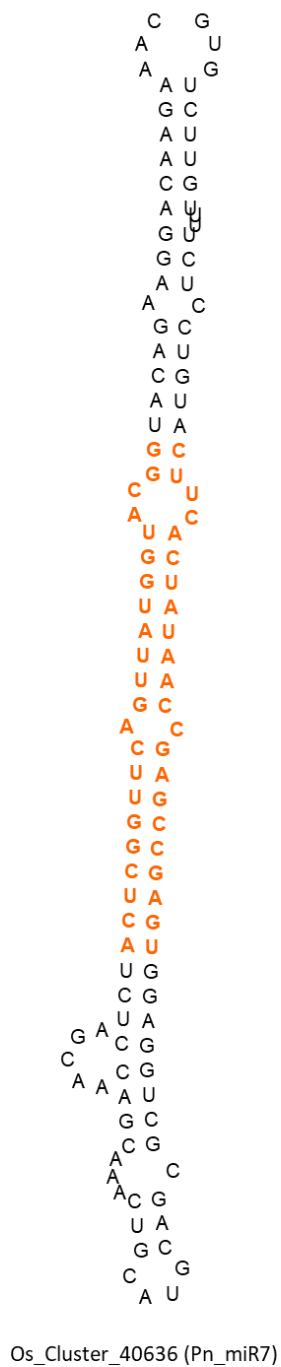

Additional file 5 (continued)

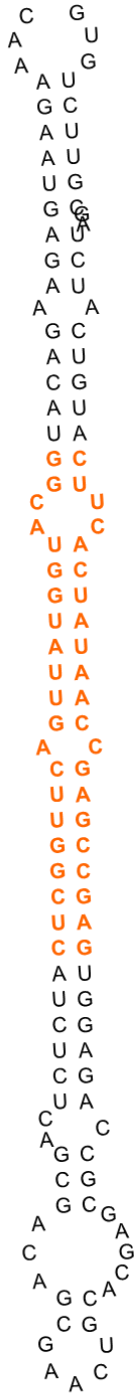

Si\_Cluster\_8553 (Pn\_miR7)

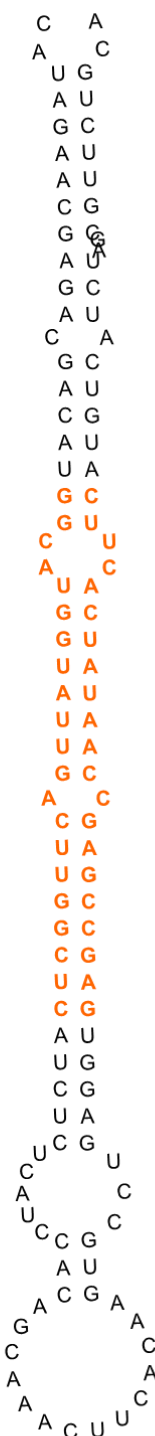

Sb\_Cluster\_15733 (Pn\_miR7)

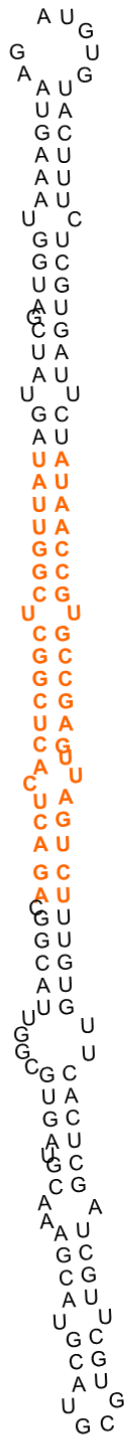

Os\_Cluster\_21224 (Pn\_miR8)

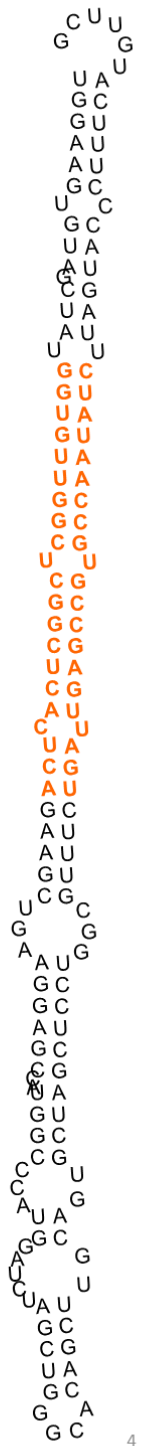

Si\_Cluster\_55039 (Pn\_miR8)

Additional file 5 (continued)

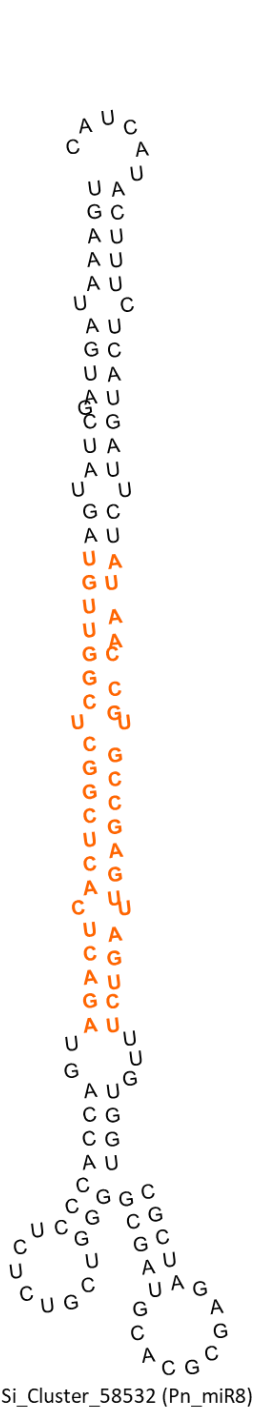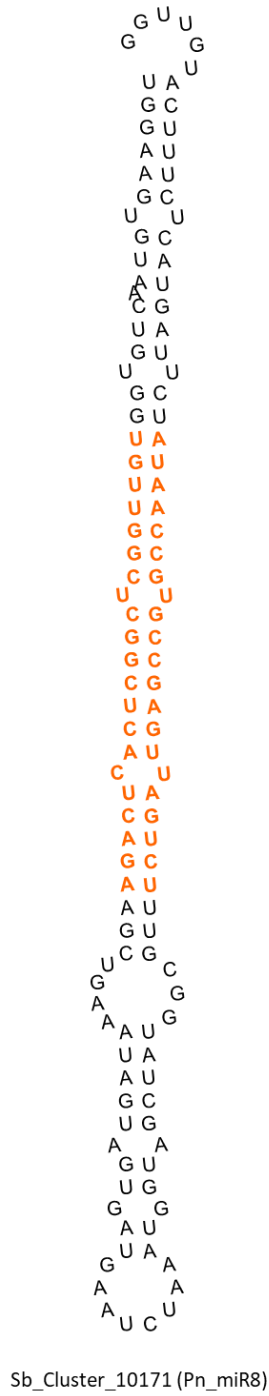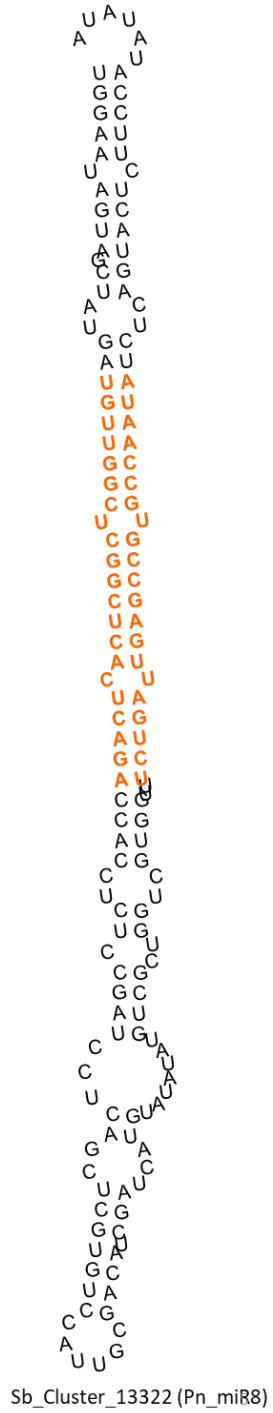

Supplement: 12864_2019_5881_MOESM5_ESM.pdf [file 12864_2019_5881_MOESM5_ESM.pdf]
