# Supplementary material for: Small RNA-seq reveals novel regulatory components for apomixis in Paspalum notatum
Source: PubMed Central journal article supplement (PMC6567921; doi:10.1186/s12864-019-5881-0), 2019-06-13

**Additional file 6: Phylogenetic analysis of miRNA sequences.** Phylogenetic analysis by maximum likelihood method of mature miRNA sequences expressed in the *P. notatum* floral transcriptome.

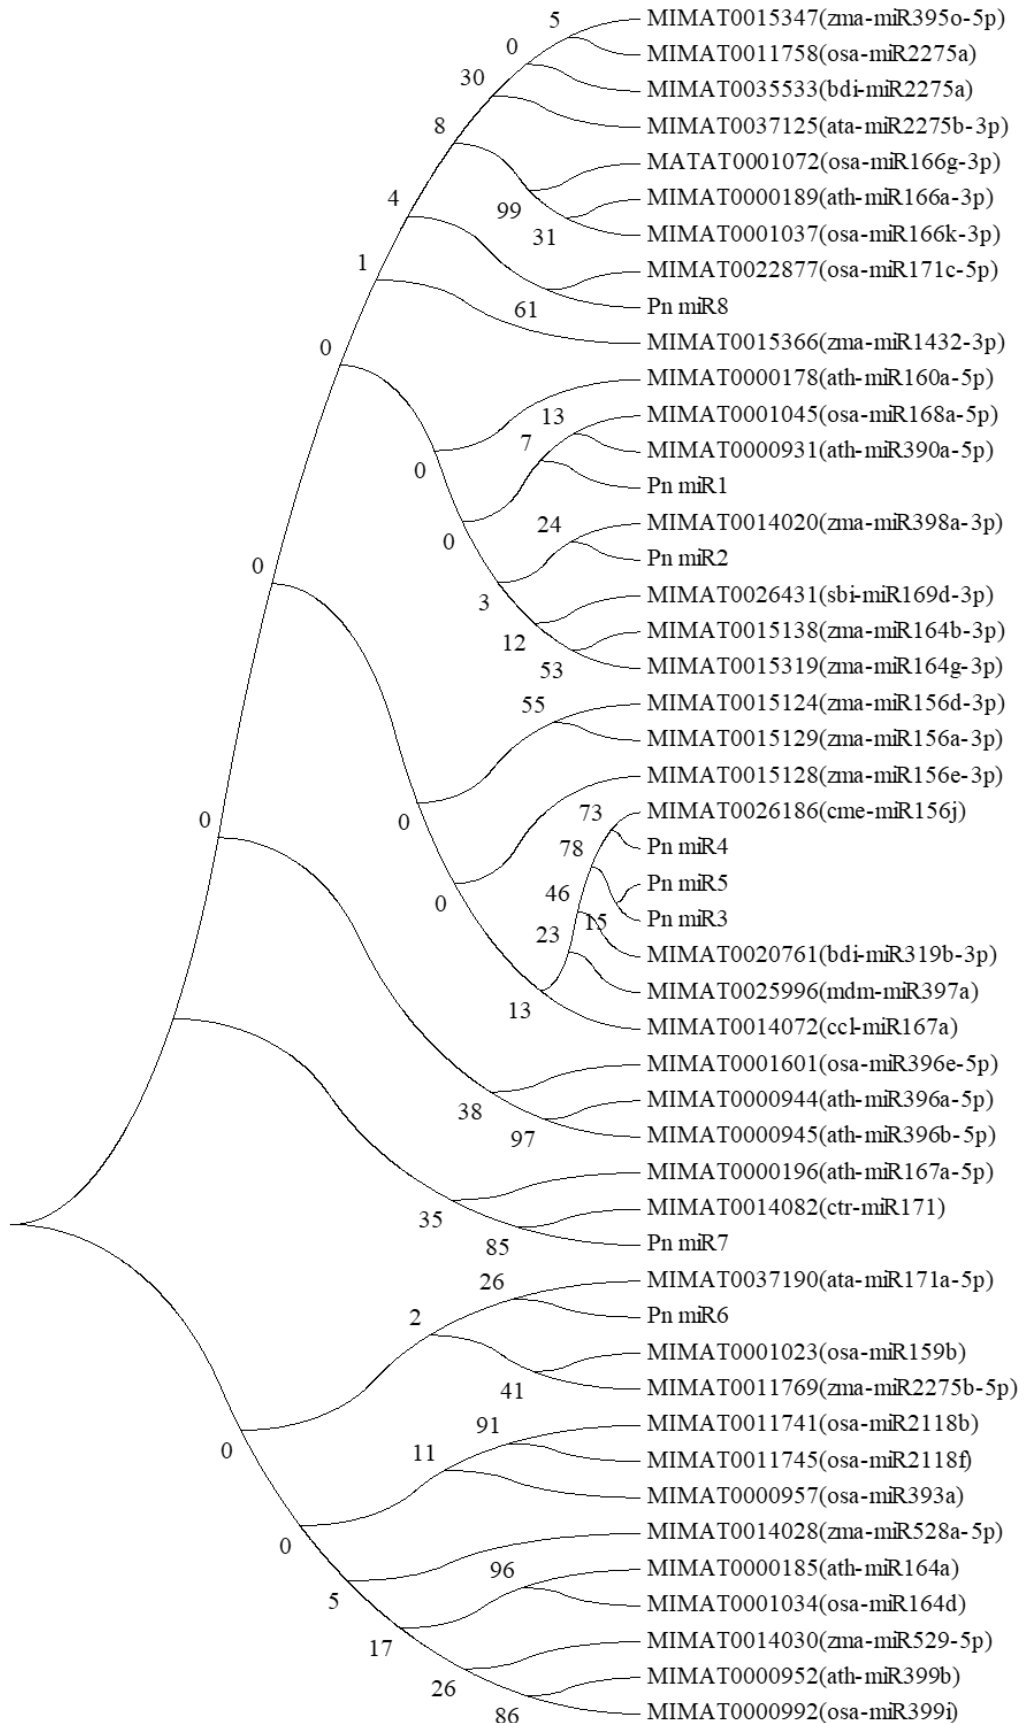

Supplement: 12864_2019_5881_MOESM6_ESM.pdf [file 12864_2019_5881_MOESM6_ESM.pdf]
